# Supplementary material
Source: ML conference proceedings conference paper supplement (https://proceedings.mlr.press/v38/hensman15.html)
Supplement: Supplementary file [file hensman15-supp.pdf]

Supplementary Material for :

# Scalable Variational Gaussian Process Classification

James Hensman, Alexander G. de G. Matthews, Zoubin Ghahramani

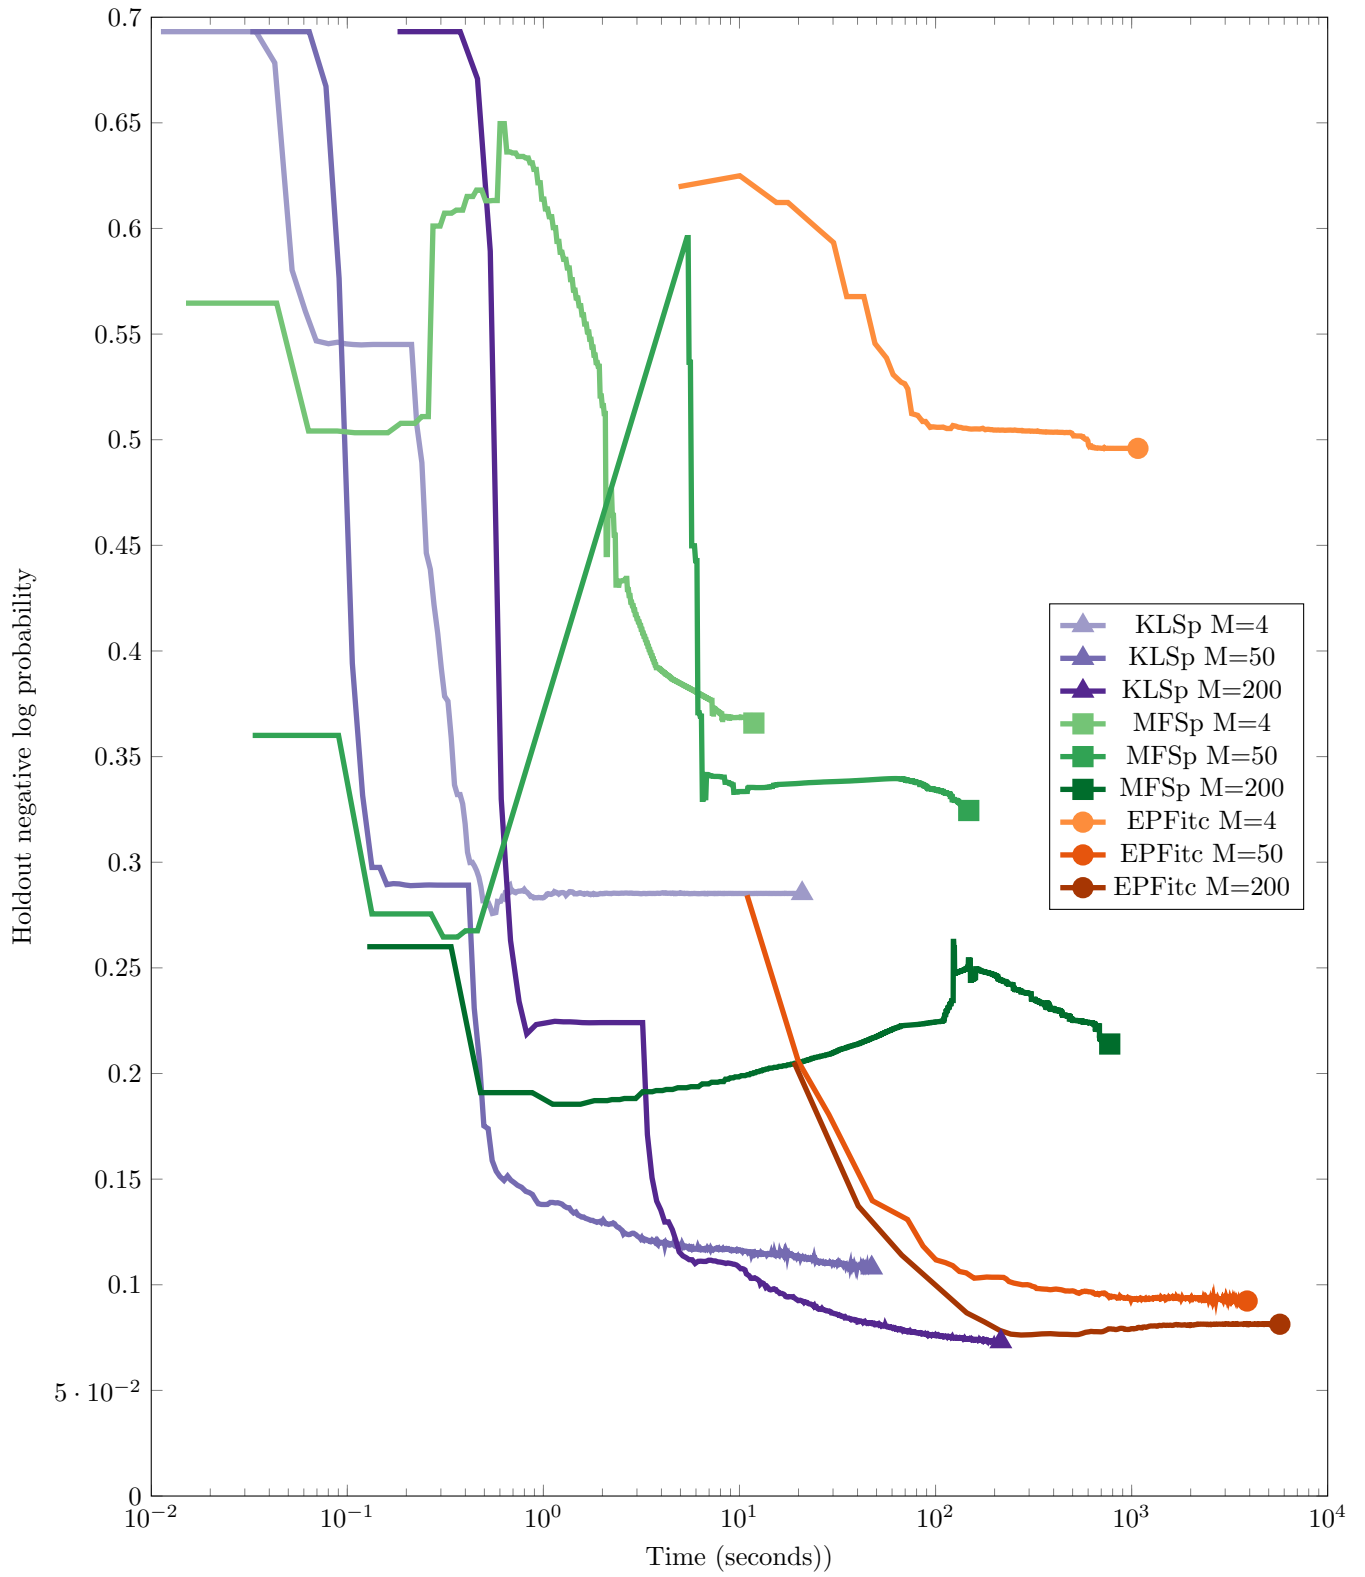

Figure S.1 : Hold out predictive densities of the different methods on the *image* dataset.

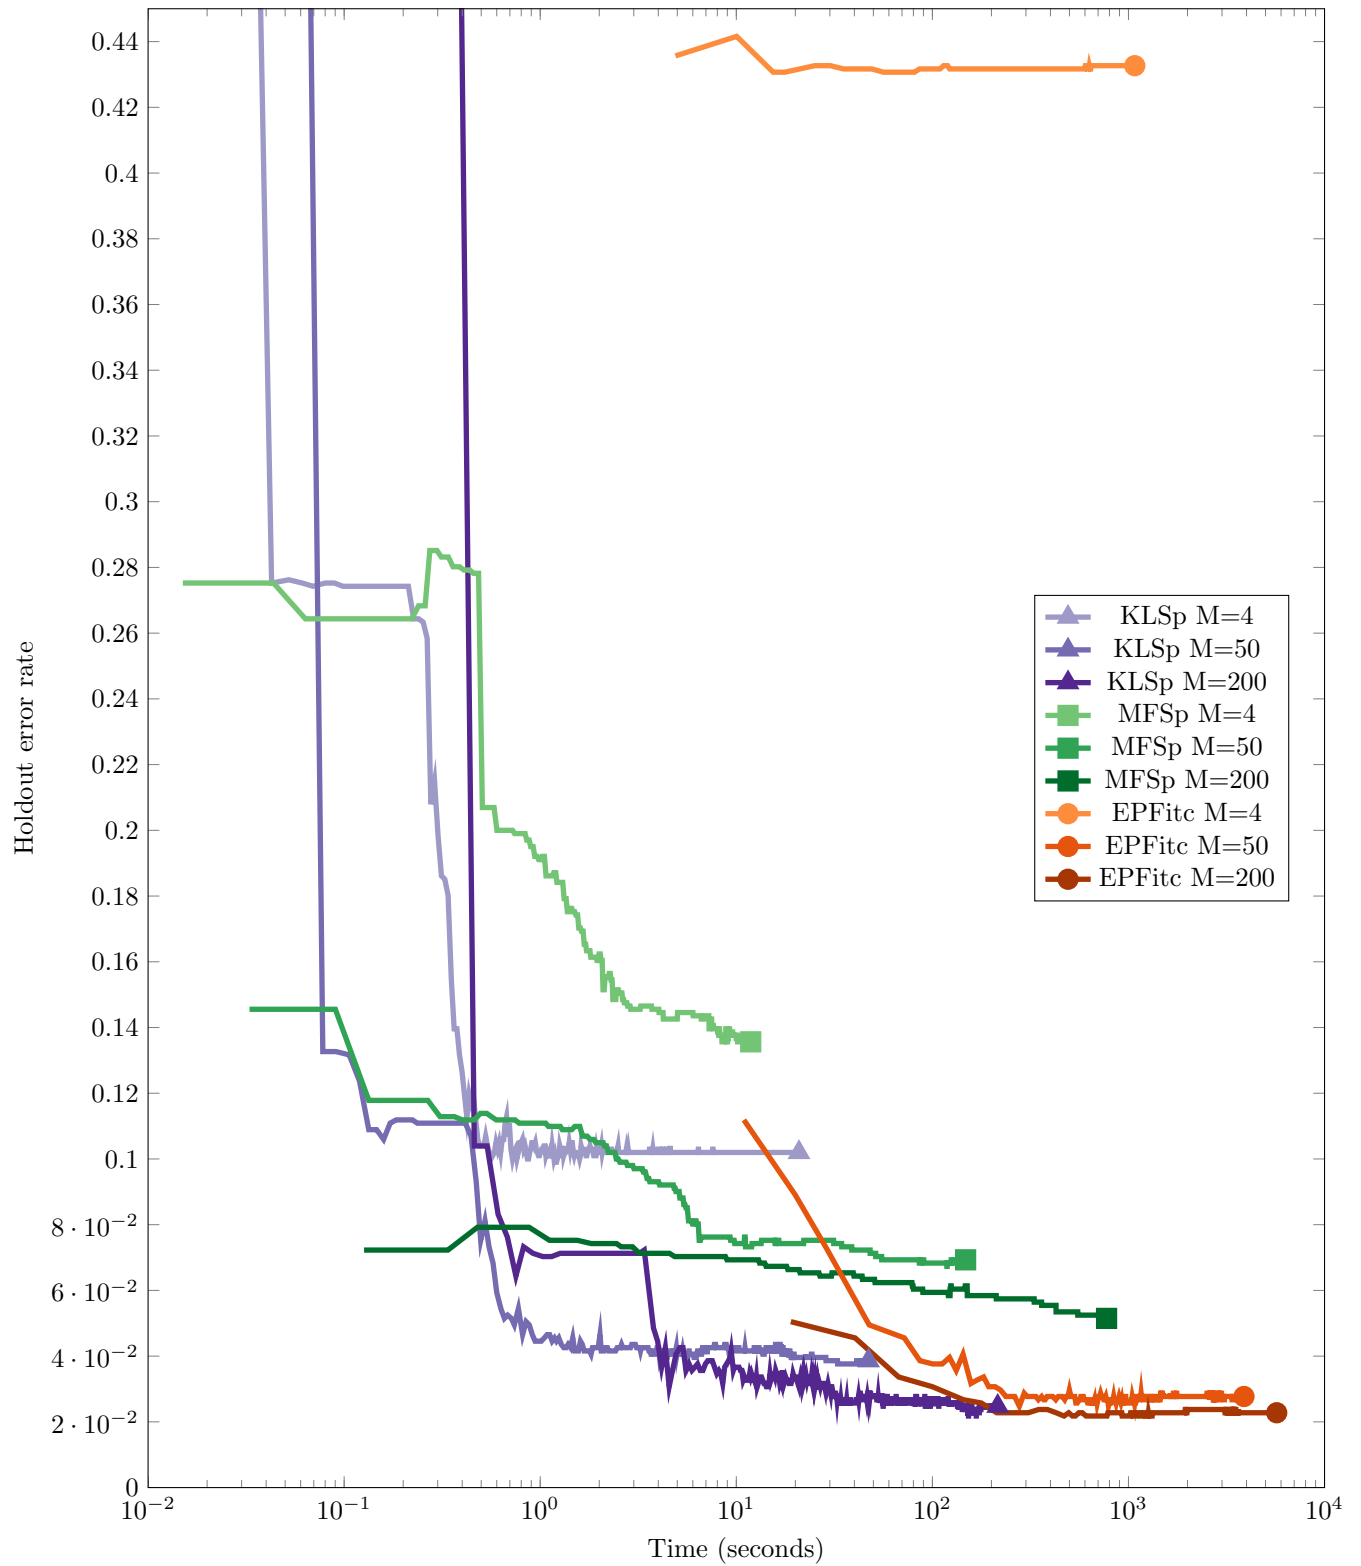Figure S.2 : Hold out errors of the different methods on the *image* dataset.

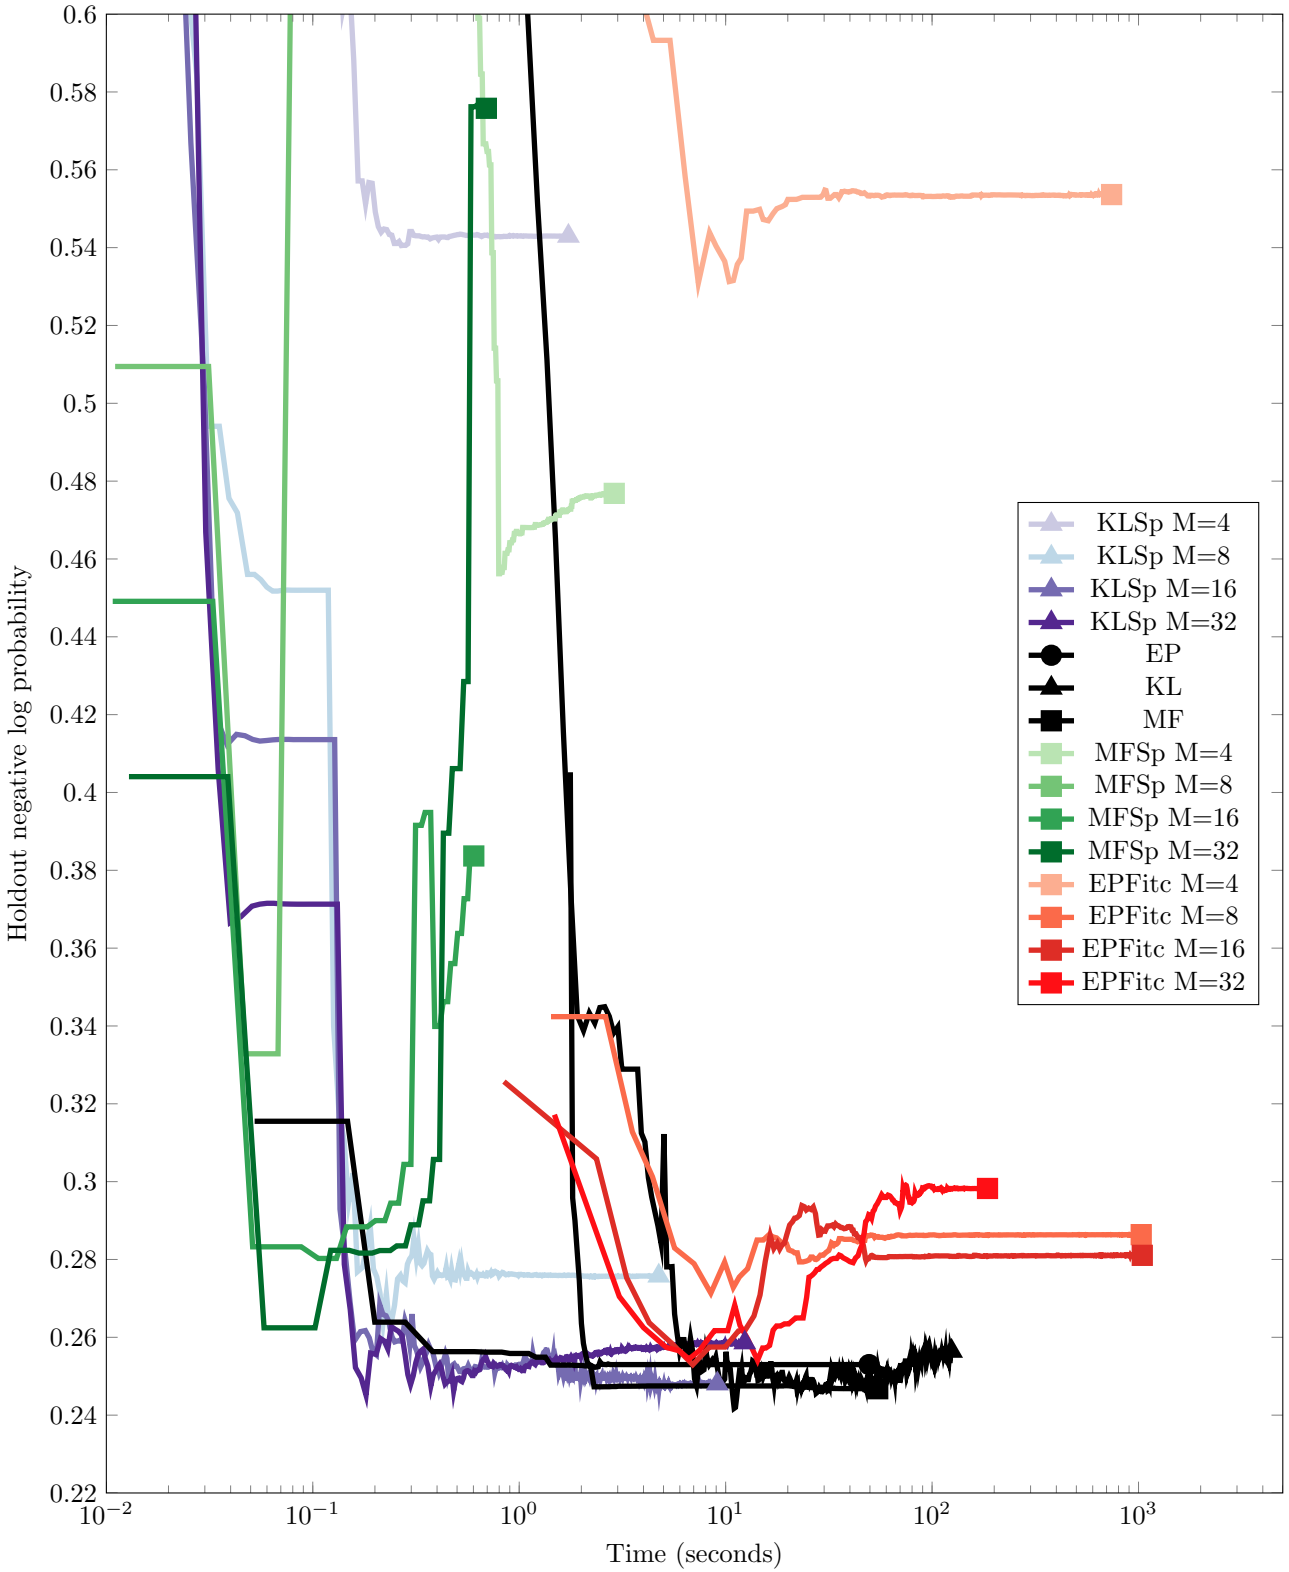

Figure S.3 : Hold out predictive densities of the different methods on the *banana* dataset.

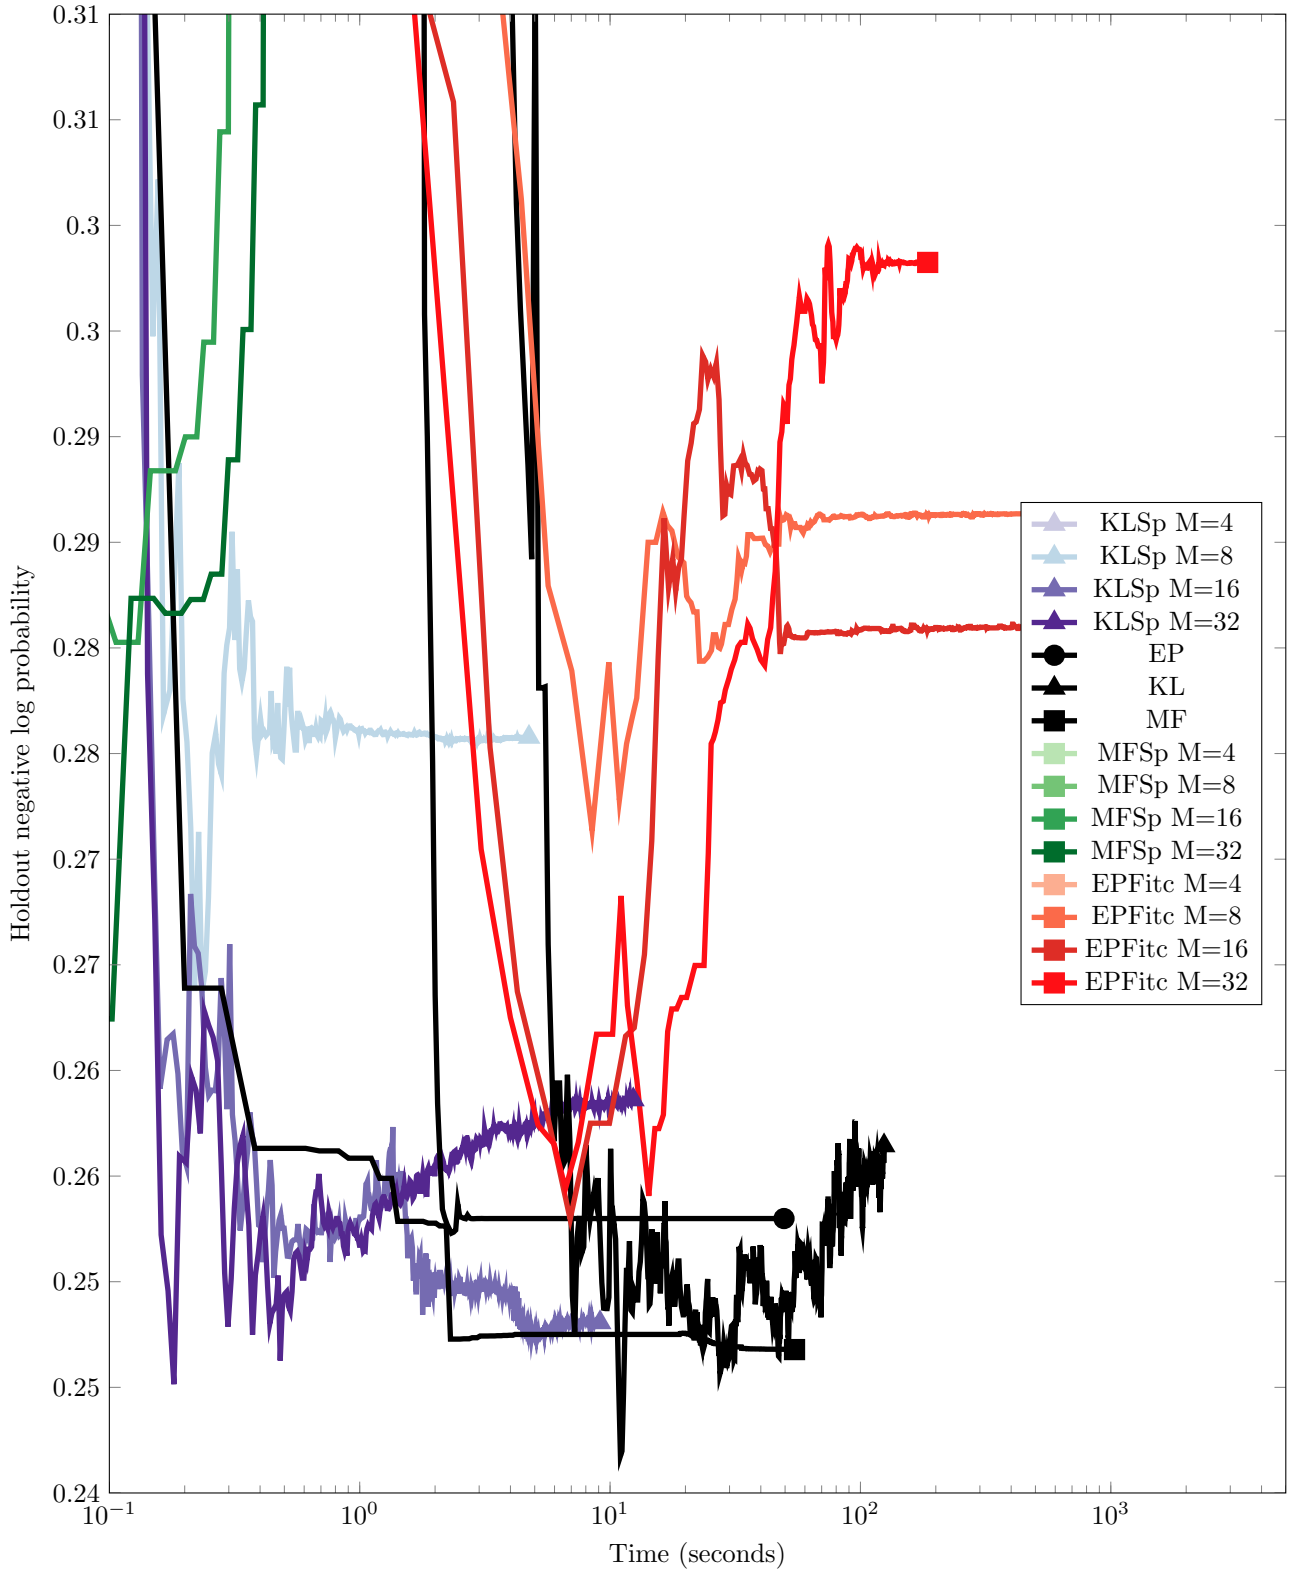Figure S.4 : Hold out predictive densities of the different methods on the *banana* dataset.

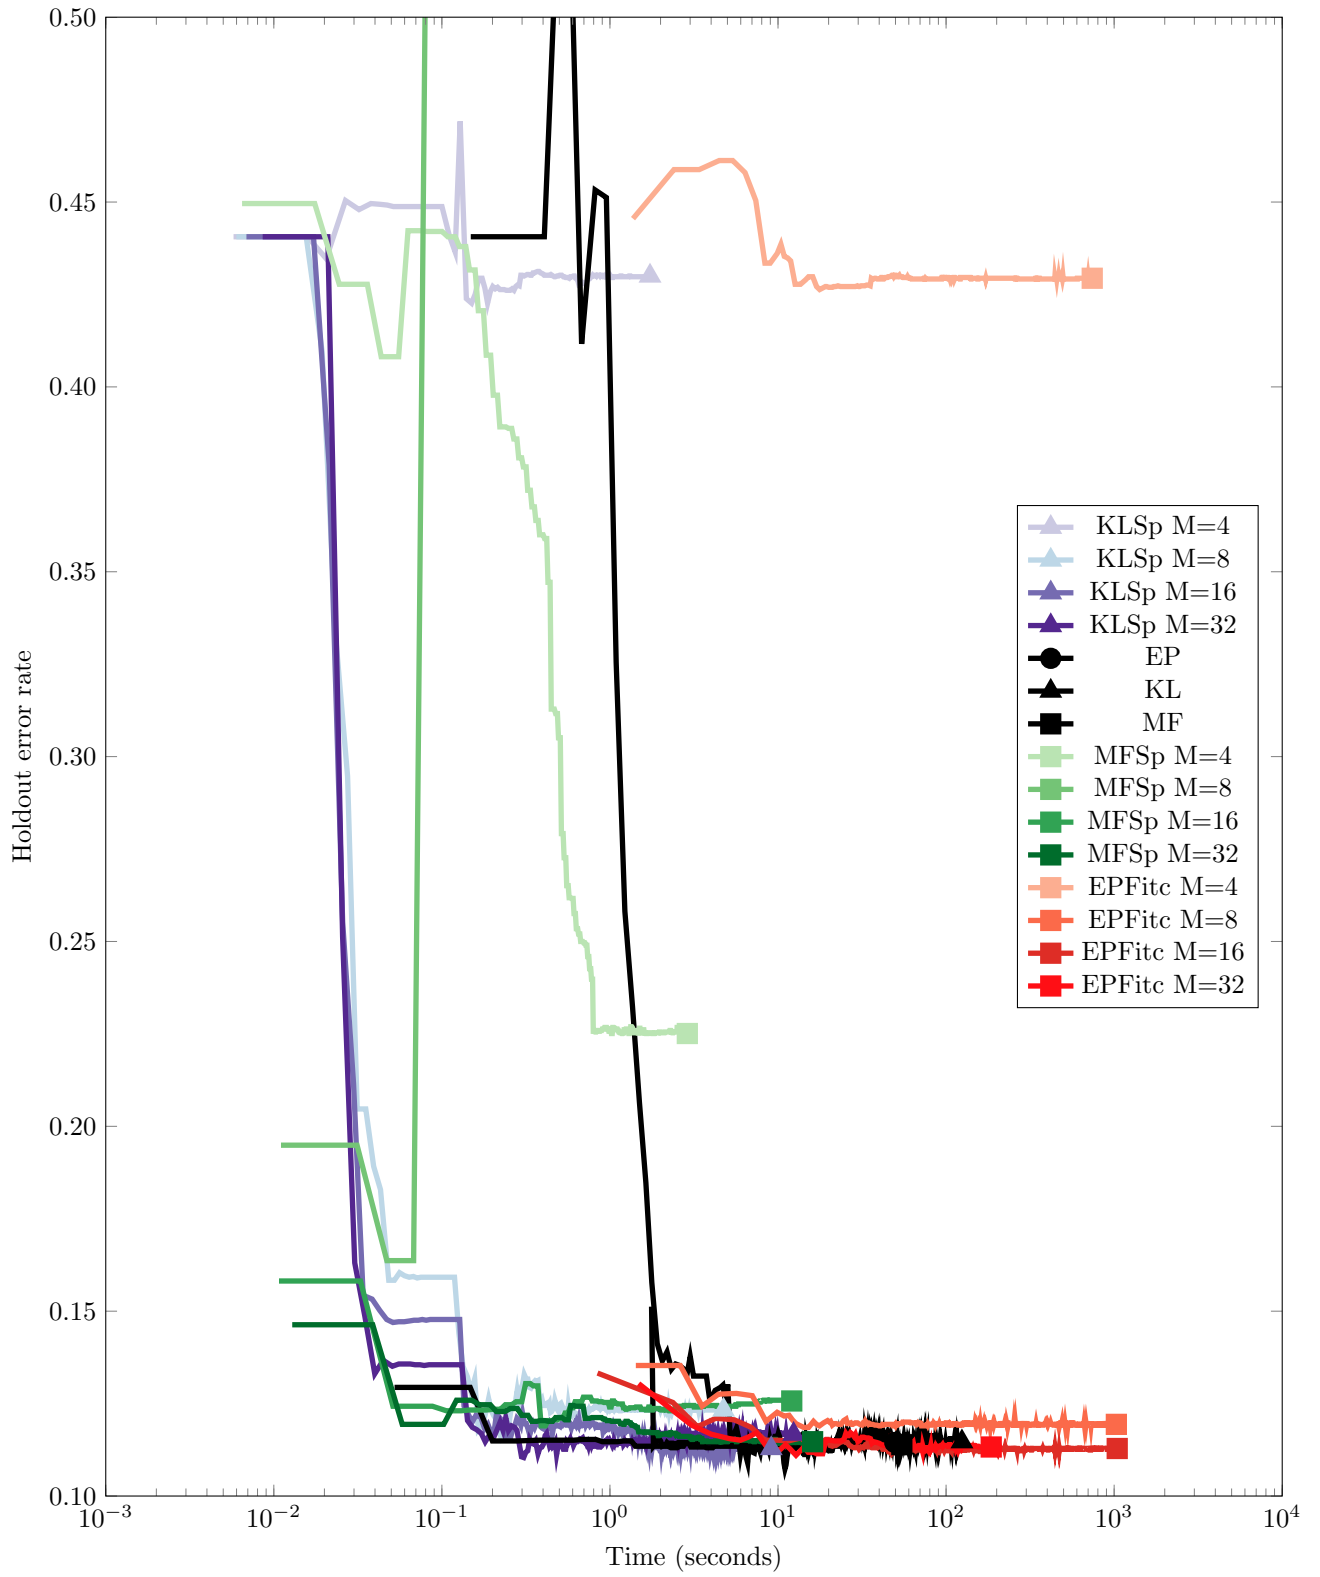

Figure S.5 : Hold out errors of the different methods on the *banana* dataset.

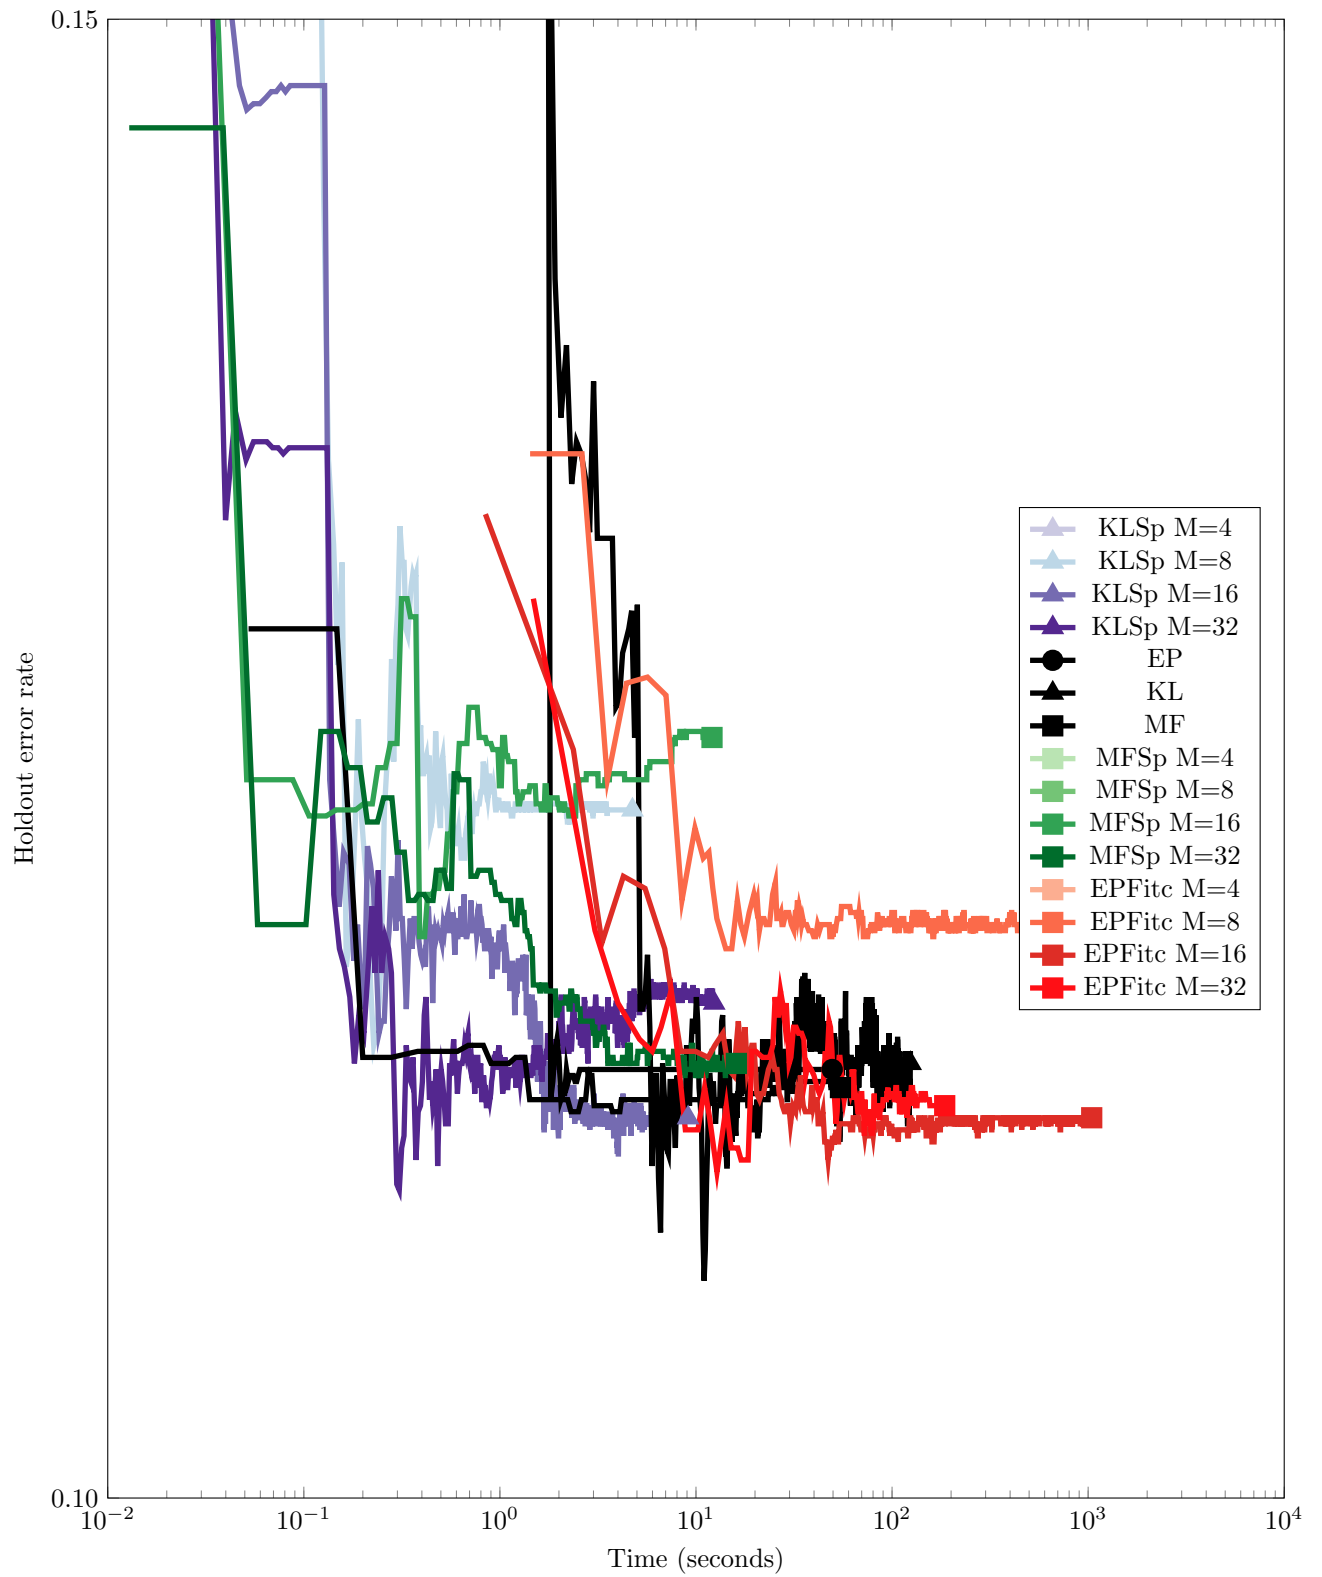Figure S.6 : Hold out errors of the different methods on the *banana* dataset.
